# Supplementary material
Source: MDPI journal article supplement (https://www.mdpi.com/1099-4300/24/11/1661)
Supplement: s1 [file s1]

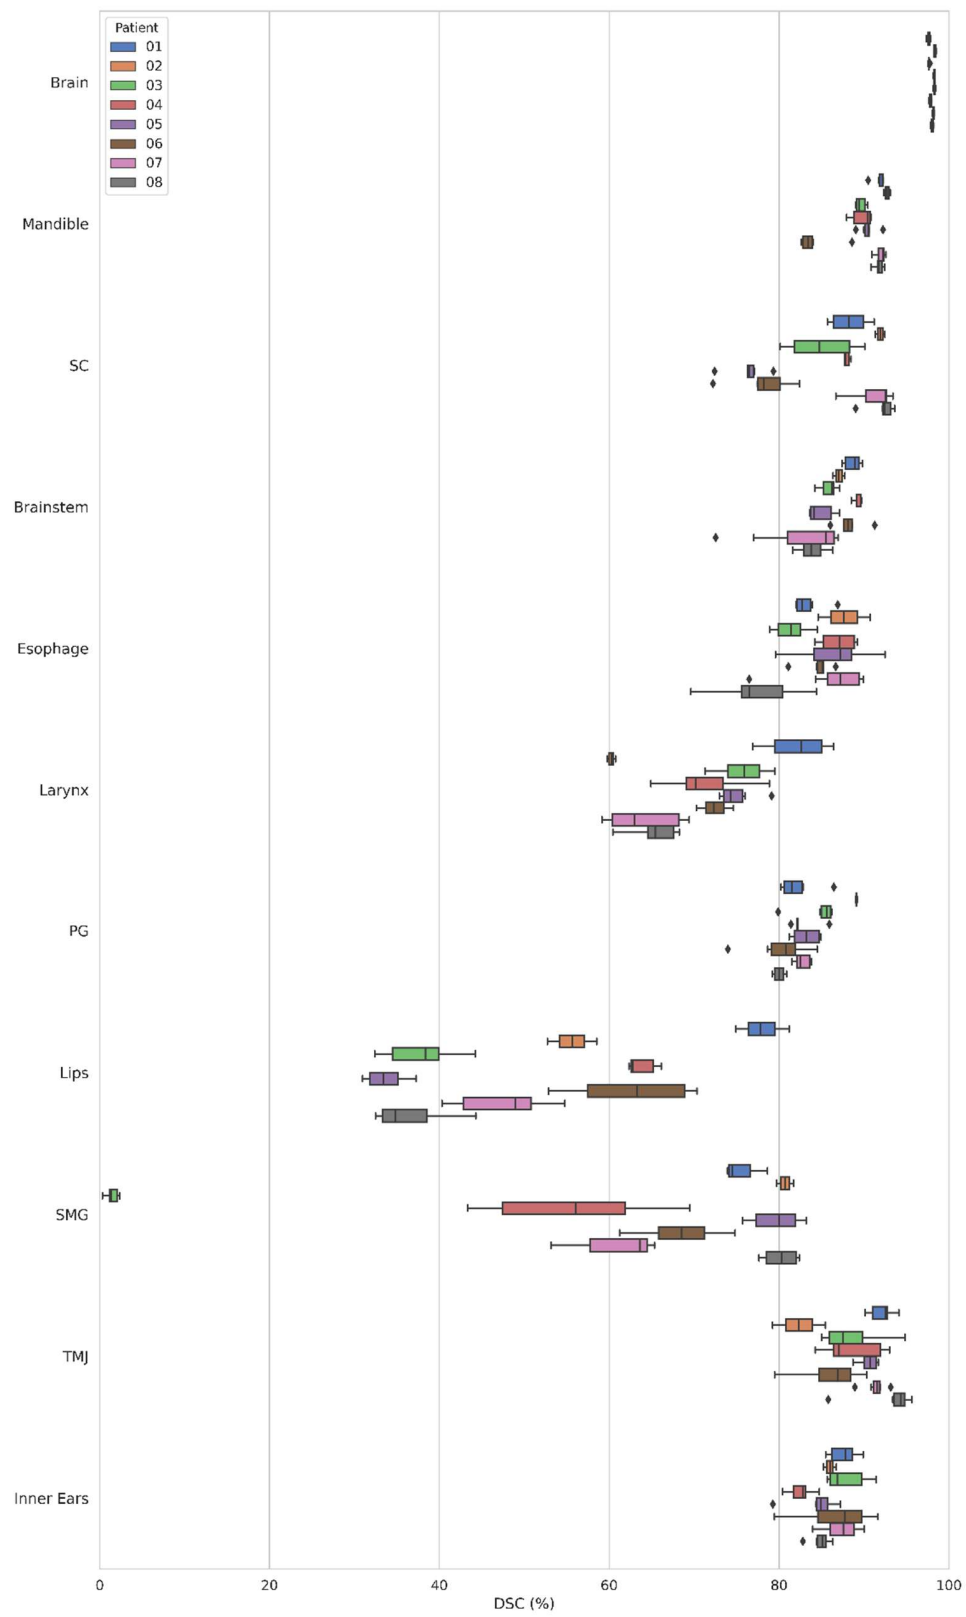

**Figure S1.** Analysis of the DSC per OAR and patient obtained with the trained semi-supervised nnU-Net.

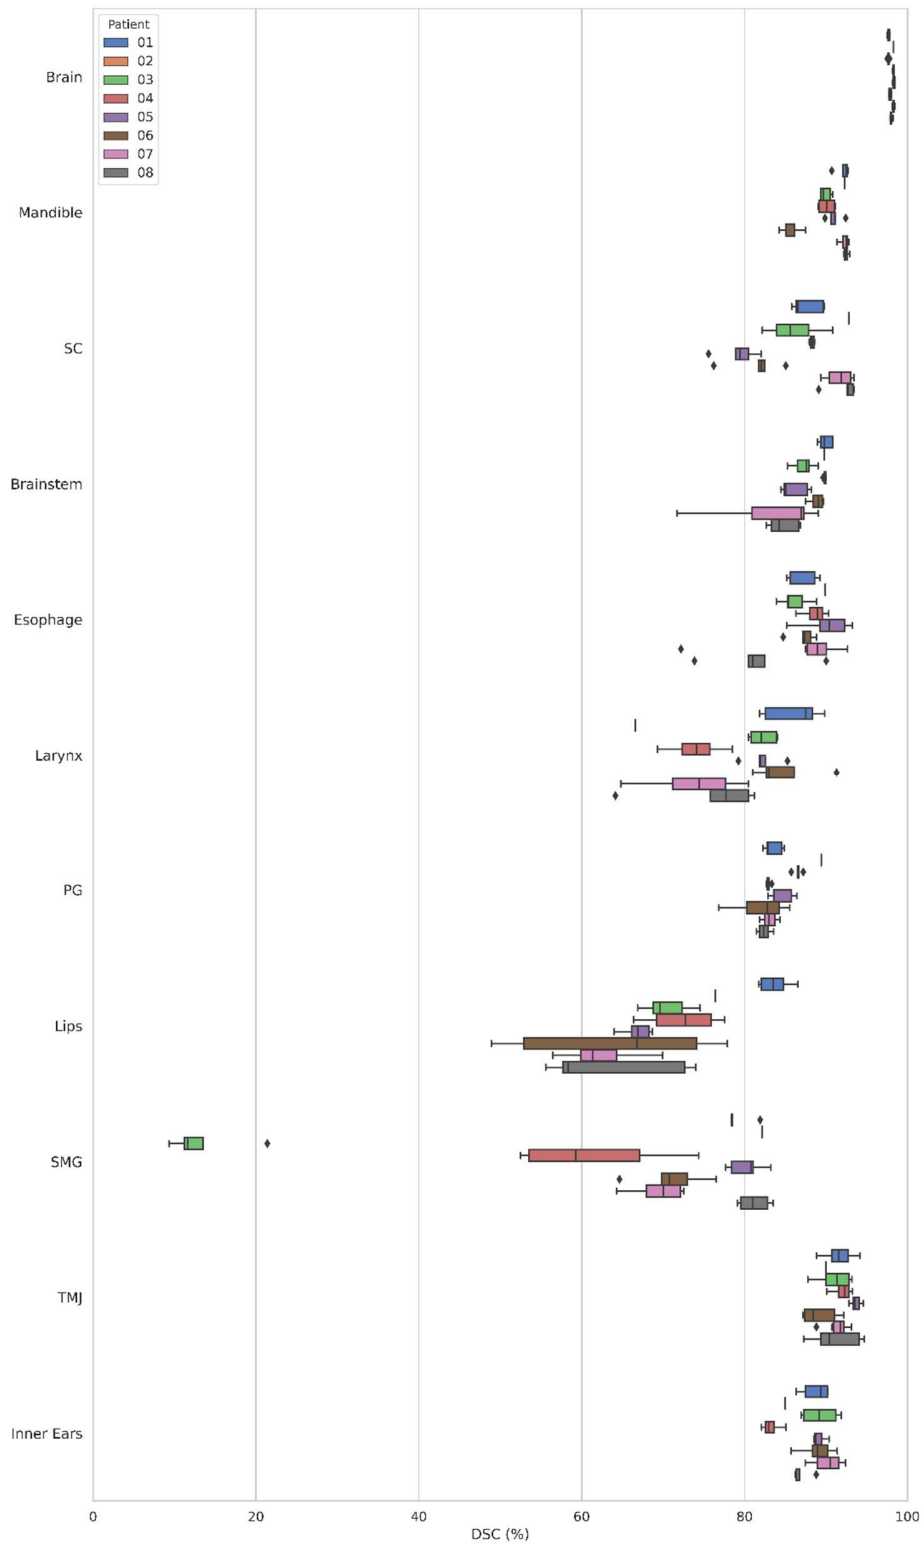

**Figure S2.** Analysis of the DSC per OAR and patient obtained with the trained self-supervised nnU-Net (including a baseline CT image from each patient in the training).
